# Supplementary material for: Accuracy of Estimation of Genomic Breeding Values in Pigs Using Low-Density Genotypes and Imputation
Source: PubMed Central journal article supplement (PMC4059235; doi:10.1534/g3.114.010504), 2014-02-13
Supplement: supp_g3.114.010504_FigureS2.pdf [file supp_g3.114.010504_FigureS2.pdf]

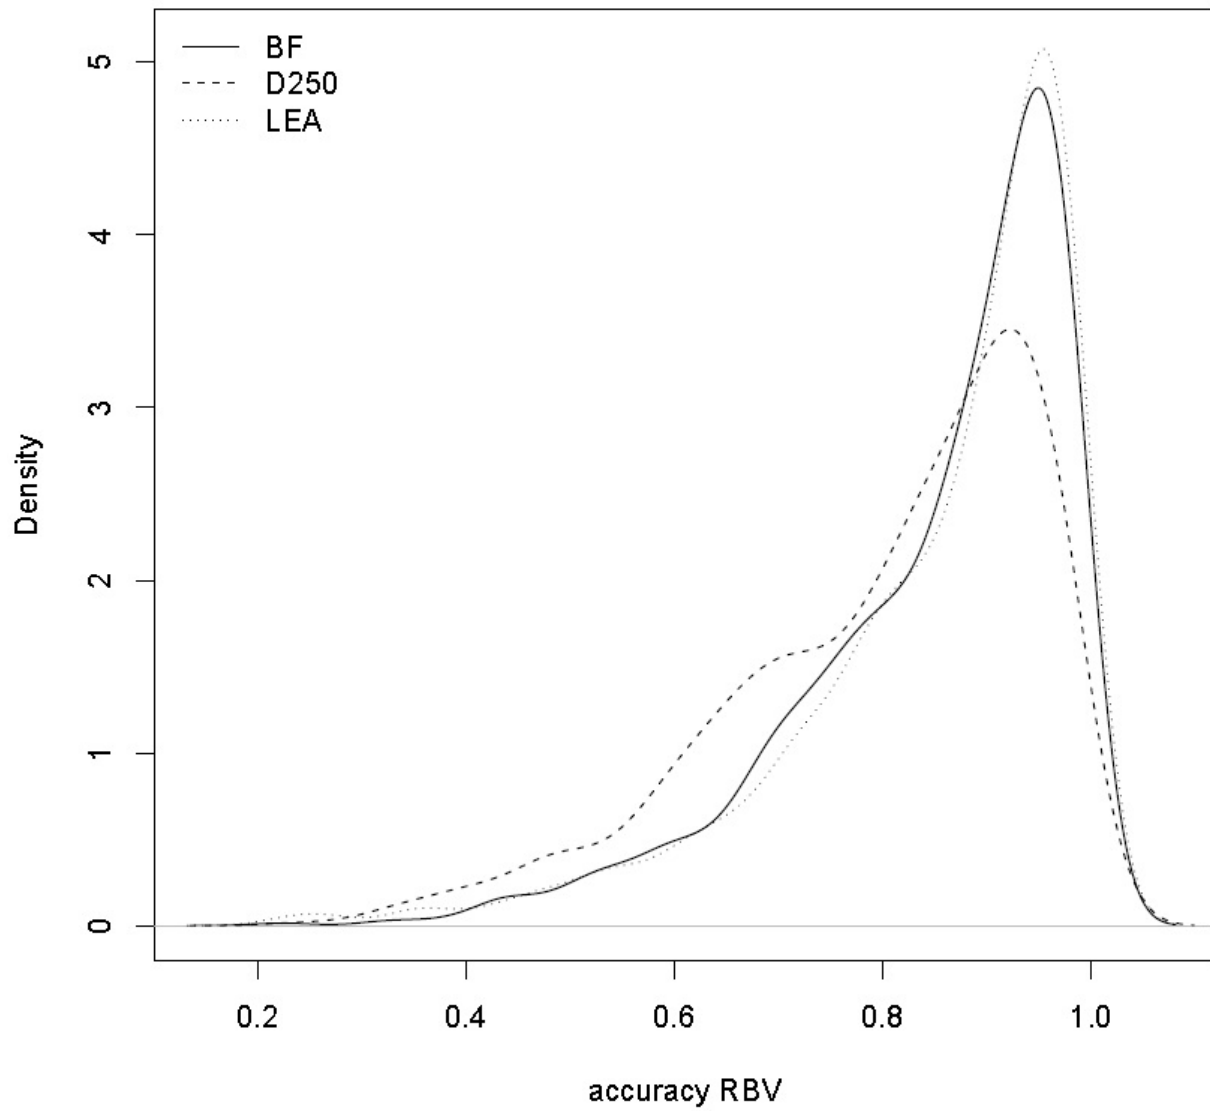

**Figure S2** Density distribution of accuracy of EBV ( $r_{EBV}$ ) for three traits, showing that for D250 the average  $r_{EBV}$  was lower compared to the other two traits
