# Supplementary material for: Accuracy of Estimation of Genomic Breeding Values in Pigs Using Low-Density Genotypes and Imputation
Source: PubMed Central journal article supplement (PMC4059235; doi:10.1534/g3.114.010504), 2014-02-13
Supplement: supp_g3.114.010504_FigureS3.pdf [file supp_g3.114.010504_FigureS3.pdf]

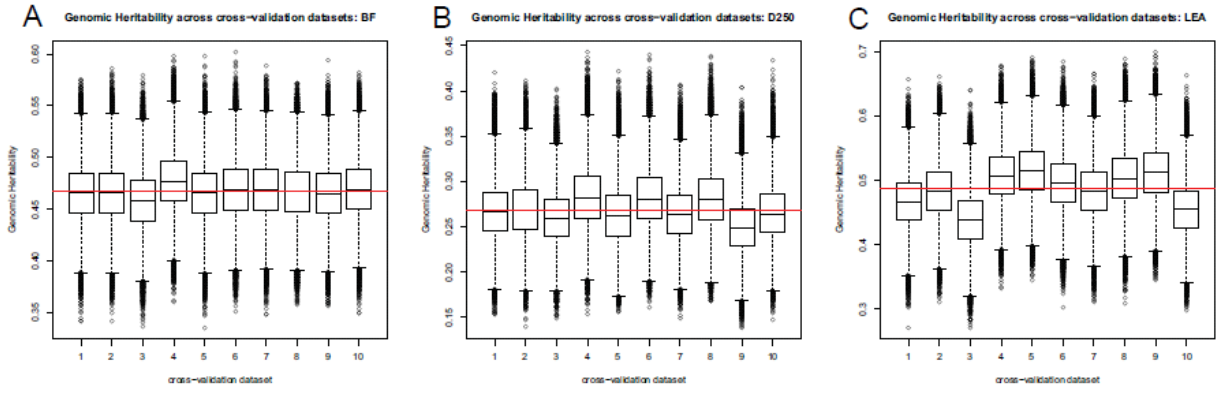

**Figure S3** Distribution of genomic heritability across 10 cross-validation datasets for (A) BF, (B) D250, and (C) LEA
