# Supplementary material for: Accuracy of Estimation of Genomic Breeding Values in Pigs Using Low-Density Genotypes and Imputation
Source: PubMed Central journal article supplement (PMC4059235; doi:10.1534/g3.114.010504), 2014-02-13
Supplement: supp_g3.114.010504_FigureS4.pdf [file supp_g3.114.010504_FigureS4.pdf]

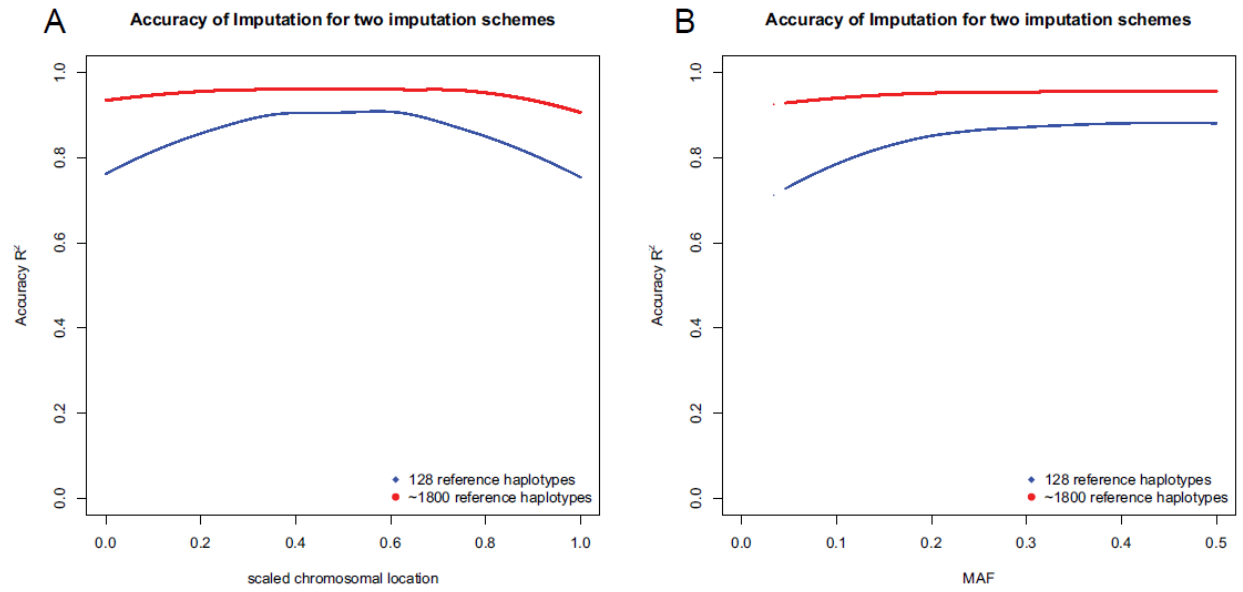

**Figure S4** Average accuracy of genotype imputation for imputation from a small (blue) or large (red) reference panel as a function of (A) chromosomal location of SNP and (B) MAF
